# Supplementary material for: Transcriptomic Analysis of Liver Tissue of Black Sea Bass (Centropristis striata) Exposed to High Nitrogen Environment
Source: MDPI journal article supplement (doi:10.3390/genes14071440), 2023-07-13
Supplement: s1 [file s1]

Table S1. Summary of RNA-Seq de novo assembly results

| Assembly               | Info        |
|------------------------|-------------|
| Total unigenes num:    | 84,603      |
| Total unigenes length: | 73,791,352  |
| Total isoform num:     | 137,862     |
| Total isoform length:  | 147,461,435 |
| Average length:        | 872         |
| Largest Unigene:       | 17,156      |
| N50:                   | 1,060       |
