# Supplementary material for: Transcriptomic Analysis of Liver Tissue of Black Sea Bass (Centropristis striata) Exposed to High Nitrogen Environment
Source: MDPI journal article supplement (doi:10.3390/genes14071440), 2023-07-13
Supplement: s1 [file s1]

Table S3. Control (ZD) vs. salt-treated (ZS) Kyoto Encyclopedia of Genes and Genomes pathway enrichment.

| <b>Terms</b>                                 | <b>Input number</b> | <b>Background number</b> | <b>P-Value</b> | <b>ID</b> |
|----------------------------------------------|---------------------|--------------------------|----------------|-----------|
| Photosynthesis                               | 31                  | 32                       | 3.54E-13       | ko00195   |
| Complement and coagulation cascades          | 71                  | 264                      | 8.20E-07       | ko04610   |
| Staphylococcus aureus infection              | 54                  | 180                      | 1.11E-06       | ko05150   |
| Asthma                                       | 19                  | 36                       | 9.90E-06       | ko05310   |
| Antigen processing and presentation          | 39                  | 123                      | 1.13E-05       | ko04612   |
| Photosynthesis - antenna proteins            | 10                  | 10                       | 3.26E-05       | ko00196   |
| Systemic lupus erythematosus                 | 54                  | 210                      | 4.42E-05       | ko05322   |
| Intestinal immune network for IgA production | 21                  | 51                       | 6.33E-05       | ko04672   |
| Graft-versus-host disease                    | 24                  | 72                       | 0.000280729    | ko05332   |
| Autoimmune thyroid disease                   | 24                  | 72                       | 0.000280729    | ko05320   |
| Oxidative phosphorylation                    | 48                  | 196                      | 0.000295145    | ko00190   |
| Fatty acid degradation                       | 32                  | 113                      | 0.000366486    | ko00071   |
| Terpenoid backbone biosynthesis              | 16                  | 38                       | 0.000375019    | ko00900   |
| Allograft rejection                          | 24                  | 74                       | 0.000390246    | ko05330   |
| Type I diabetes mellitus                     | 27                  | 94                       | 0.000845631    | ko04940   |
| Peroxisome                                   | 39                  | 159                      | 0.001001795    | ko04146   |
| Steroid biosynthesis                         | 13                  | 31                       | 0.001333593    | ko00100   |
| Leishmaniasis                                | 42                  | 179                      | 0.00137482     | ko05140   |
| Fat digestion and absorption                 | 24                  | 86                       | 0.002191785    | ko04975   |
| Viral myocarditis                            | 30                  | 123                      | 0.00383063     | ko05416   |
| Tryptophan metabolism                        | 26                  | 103                      | 0.004646498    | ko00380   |
| Protein digestion and absorption             | 32                  | 137                      | 0.005023353    | ko04974   |
| Vitamin digestion and absorption             | 15                  | 48                       | 0.005990803    | ko04977   |

|                                           |     |     |             |         |
|-------------------------------------------|-----|-----|-------------|---------|
| Inflammatory bowel disease (IBD)          | 24  | 95  | 0.006302596 | ko05321 |
| Chloroalkane and chloroalkene degradation | 13  | 40  | 0.007815983 | ko00625 |
| Parkinson's disease                       | 46  | 227 | 0.009133606 | ko05012 |
| Glycolysis / Gluconeogenesis              | 37  | 175 | 0.010494004 | ko00010 |
| Rheumatoid arthritis                      | 25  | 106 | 0.010950025 | ko05323 |
| Neuroactive ligand-receptor interaction   | 50  | 255 | 0.011380661 | ko04080 |
| Pancreatic secretion                      | 39  | 193 | 0.015873592 | ko04972 |
| Bile secretion                            | 33  | 157 | 0.015998236 | ko04976 |
| Phagosome                                 | 63  | 343 | 0.016058226 | ko04145 |
| Limonene and pinene degradation           | 8   | 21  | 0.016877325 | ko00903 |
| Tyrosine metabolism                       | 18  | 72  | 0.017831781 | ko00350 |
| Glycerolipid metabolism                   | 32  | 154 | 0.019815597 | ko00561 |
| PI3K-Akt signaling pathway                | 100 | 603 | 0.031714189 | ko04151 |
| Primary immunodeficiency                  | 11  | 40  | 0.034435545 | ko05340 |
| Glyoxylate and dicarboxylate metabolism   | 17  | 73  | 0.034724745 | ko00630 |
| Steroid hormone biosynthesis              | 19  | 85  | 0.036399129 | ko00140 |
| Arginine and proline metabolism           | 26  | 128 | 0.040452298 | ko00330 |
| Linoleic acid metabolism                  | 14  | 58  | 0.04198863  | ko00591 |
| Arachidonic acid metabolism               | 19  | 89  | 0.050762051 | ko00590 |
| beta-Alanine metabolism                   | 14  | 61  | 0.056480053 | ko00410 |
| Nitrogen metabolism                       | 6   | 18  | 0.056959309 | ko00910 |
| PPAR signaling pathway                    | 27  | 140 | 0.059014611 | ko03320 |
| Betalain biosynthesis                     | 3   | 5   | 0.059055364 | ko00965 |
| Retinol metabolism                        | 20  | 97  | 0.059165442 | ko00830 |
| Other types of O-glycan biosynthesis      | 10  | 39  | 0.059167314 | ko00514 |

|                                                            |    |     |             |         |
|------------------------------------------------------------|----|-----|-------------|---------|
| Phototransduction - fly                                    | 13 | 56  | 0.060564058 | ko04745 |
| Valine, leucine and isoleucine degradation                 | 19 | 92  | 0.063887508 | ko00280 |
| Aminobenzoate degradation                                  | 4  | 10  | 0.074749241 | ko00627 |
| Pyruvate metabolism                                        | 20 | 101 | 0.078327265 | ko00620 |
| Metabolism of xenobiotics by cytochrome P450               | 19 | 96  | 0.084760442 | ko00980 |
| One carbon pool by folate                                  | 11 | 48  | 0.084906251 | ko00670 |
| Histidine metabolism                                       | 14 | 66  | 0.087537276 | ko00340 |
| Glycosphingolipid biosynthesis - lacto and neolacto series | 7  | 26  | 0.088627505 | ko00601 |
| Carbon fixation in photosynthetic organisms                | 13 | 61  | 0.094858856 | ko00710 |
| Butanoate metabolism                                       | 9  | 39  | 0.10913732  | ko00650 |
| Thiamine metabolism                                        | 4  | 12  | 0.112528588 | ko00730 |
| alpha-Linolenic acid metabolism                            | 8  | 34  | 0.117992924 | ko00592 |
| Morphine addiction                                         | 25 | 140 | 0.119475813 | ko05032 |
| Chemical carcinogenesis                                    | 19 | 102 | 0.123620301 | ko05204 |
| Glycine, serine and threonine metabolism                   | 19 | 102 | 0.123620301 | ko00260 |
| Tuberculosis                                               | 64 | 406 | 0.134472835 | ko05152 |
| Ovarian steroidogenesis                                    | 21 | 117 | 0.139146391 | ko04913 |
| GABAergic synapse                                          | 23 | 131 | 0.146013203 | ko04727 |
| Ascorbate and aldarate metabolism                          | 14 | 73  | 0.146157452 | ko00053 |
| Naphthalene degradation                                    | 5  | 19  | 0.147638321 | ko00626 |
| Aminoacyl-tRNA biosynthesis                                | 15 | 80  | 0.152453826 | ko00970 |
| Insulin secretion                                          | 29 | 172 | 0.154541679 | ko04911 |
| Fatty acid metabolism                                      | 19 | 106 | 0.154570021 | ko01212 |
| RNA polymerase                                             | 9  | 43  | 0.157643734 | ko03020 |
| Biosynthesis of amino acids                                | 28 | 166 | 0.158997964 | ko01230 |

|                                            |    |     |             |         |
|--------------------------------------------|----|-----|-------------|---------|
| Citrate cycle (TCA cycle)                  | 14 | 75  | 0.166063375 | ko00020 |
| Cell adhesion molecules (CAMs)             | 37 | 228 | 0.167001845 | ko04514 |
| Porphyrin and chlorophyll metabolism       | 16 | 88  | 0.16742448  | ko00860 |
| Isoquinoline alkaloid biosynthesis         | 5  | 20  | 0.167619418 | ko00950 |
| Gastric acid secretion                     | 26 | 155 | 0.175686908 | ko04971 |
| Synthesis and degradation of ketone bodies | 4  | 15  | 0.181324296 | ko00072 |
| Carbon fixation pathways in prokaryotes    | 9  | 45  | 0.185225814 | ko00720 |
| Cardiac muscle contraction                 | 18 | 103 | 0.185730548 | ko04260 |
| Legionellosis                              | 29 | 177 | 0.188532669 | ko05134 |
| Circadian entrainment                      | 29 | 178 | 0.195768103 | ko04713 |
| Cysteine and methionine metabolism         | 15 | 85  | 0.203329118 | ko00270 |
| Hematopoietic cell lineage                 | 18 | 105 | 0.204909657 | ko04640 |
| Caprolactam degradation                    | 4  | 16  | 0.206777957 | ko00930 |
| Degradation of aromatic compounds          | 6  | 28  | 0.209990636 | ko01220 |
| Cytokine-cytokine receptor interaction     | 38 | 244 | 0.224547389 | ko04060 |
| Adipocytokine signaling pathway            | 22 | 134 | 0.224769362 | ko04920 |
| Sulfur relay system                        | 3  | 11  | 0.226289028 | ko04122 |
| Glutamatergic synapse                      | 29 | 183 | 0.233980106 | ko04724 |
| Lysine degradation                         | 26 | 163 | 0.239424624 | ko00310 |
| Pentose phosphate pathway                  | 13 | 75  | 0.2412797   | ko00030 |
| Geraniol degradation                       | 2  | 6   | 0.243801512 | ko00281 |
| Cutin, suberine and wax biosynthesis       | 2  | 6   | 0.243801512 | ko00073 |
| Ether lipid metabolism                     | 13 | 76  | 0.254145651 | ko00565 |
| Phenylalanine metabolism                   | 8  | 43  | 0.25419065  | ko00360 |
| Platelet activation                        | 50 | 333 | 0.256067994 | ko04611 |

|                                                        |    |     |             |         |
|--------------------------------------------------------|----|-----|-------------|---------|
| Inositol phosphate metabolism                          | 27 | 172 | 0.257428497 | ko00562 |
| Alzheimer's disease                                    | 46 | 306 | 0.26403277  | ko05010 |
| Carbon metabolism                                      | 40 | 264 | 0.266124344 | ko01200 |
| Two-component system                                   | 7  | 38  | 0.281931933 | ko02020 |
| AMPK signaling pathway                                 | 47 | 316 | 0.283295764 | ko04152 |
| Ubiquinone and other terpenoid-quinone biosynthesis    | 4  | 19  | 0.28800956  | ko00130 |
| Renin-angiotensin system                               | 5  | 26  | 0.304171866 | ko04614 |
| Phototransduction                                      | 6  | 33  | 0.314431362 | ko04744 |
| ECM-receptor interaction                               | 29 | 193 | 0.319072589 | ko04512 |
| Influenza A                                            | 53 | 365 | 0.323935217 | ko05164 |
| Phenylalanine, tyrosine and tryptophan biosynthesis    | 3  | 14  | 0.327843841 | ko00400 |
| Herpes simplex infection                               | 61 | 425 | 0.339114218 | ko05168 |
| Taurine and hypotaurine metabolism                     | 4  | 21  | 0.34436274  | ko00430 |
| Primary bile acid biosynthesis                         | 4  | 21  | 0.34436274  | ko00120 |
| Drug metabolism - cytochrome P450                      | 15 | 97  | 0.349495912 | ko00982 |
| Circadian rhythm - fly                                 | 5  | 28  | 0.353247242 | ko04711 |
| Fatty acid biosynthesis                                | 7  | 42  | 0.361580003 | ko00061 |
| Calcium signaling pathway                              | 45 | 313 | 0.363004909 | ko04020 |
| Pentose and glucuronate interconversions               | 14 | 91  | 0.363474013 | ko00040 |
| Glycosaminoglycan biosynthesis - keratan sulfate       | 4  | 22  | 0.372685925 | ko00533 |
| Tropane, piperidine and pyridine alkaloid biosynthesis | 2  | 9   | 0.381629754 | ko00960 |
| Amphetamine addiction                                  | 17 | 114 | 0.385567582 | ko05031 |
| Estrogen signaling pathway                             | 31 | 215 | 0.388680064 | ko04915 |
| Thyroid hormone synthesis                              | 19 | 129 | 0.393688326 | ko04918 |
| Riboflavin metabolism                                  | 3  | 16  | 0.395890441 | ko00740 |

|                                                  |    |     |             |         |
|--------------------------------------------------|----|-----|-------------|---------|
| Regulation of autophagy                          | 6  | 37  | 0.402801601 | ko04140 |
| Biosynthesis of unsaturated fatty acids          | 6  | 37  | 0.402801601 | ko01040 |
| Glutathione metabolism                           | 14 | 94  | 0.404934569 | ko00480 |
| NF-kappa B signaling pathway                     | 22 | 152 | 0.409268917 | ko04064 |
| Olfactory transduction                           | 9  | 59  | 0.417332901 | ko04740 |
| Various types of N-glycan biosynthesis           | 10 | 67  | 0.431432765 | ko00513 |
| Fructose and mannose metabolism                  | 13 | 89  | 0.436256355 | ko00051 |
| Amyotrophic lateral sclerosis (ALS)              | 13 | 90  | 0.450707563 | ko05014 |
| Chemokine signaling pathway                      | 45 | 325 | 0.453363753 | ko04062 |
| Pertussis                                        | 32 | 230 | 0.45875725  | ko05133 |
| Benzoate degradation                             | 3  | 18  | 0.461945177 | ko00362 |
| Circadian rhythm                                 | 10 | 69  | 0.464622778 | ko04710 |
| 2-Oxocarboxylic acid metabolism                  | 6  | 40  | 0.468736967 | ko01210 |
| Serotonergic synapse                             | 23 | 165 | 0.471041766 | ko04726 |
| Cholinergic synapse                              | 31 | 225 | 0.480407024 | ko04725 |
| Proteoglycans in cancer                          | 65 | 478 | 0.489279236 | ko05205 |
| Methane metabolism                               | 12 | 86  | 0.499856093 | ko00680 |
| Melanogenesis                                    | 29 | 215 | 0.525553047 | ko04916 |
| Inflammatory mediator regulation of TRP channels | 31 | 230 | 0.52601665  | ko04750 |
| Focal adhesion                                   | 65 | 484 | 0.527031228 | ko04510 |
| ABC transporters                                 | 14 | 103 | 0.529002205 | ko02010 |
| Nicotinate and nicotinamide metabolism           | 10 | 73  | 0.529748449 | ko00760 |
| Zeatin biosynthesis                              | 1  | 5   | 0.531301245 | ko00908 |
| Drug metabolism - other enzymes                  | 13 | 96  | 0.536070581 | ko00983 |
| Plant-pathogen interaction                       | 4  | 28  | 0.536198077 | ko04626 |

|                                         |    |     |             |         |
|-----------------------------------------|----|-----|-------------|---------|
| Prion diseases                          | 8  | 59  | 0.548474227 | ko05020 |
| Thyroid cancer                          | 10 | 75  | 0.561300793 | ko05216 |
| Fatty acid elongation                   | 5  | 37  | 0.567587534 | ko00062 |
| Purine metabolism                       | 44 | 334 | 0.577618623 | ko00230 |
| Retrograde endocannabinoid signaling    | 19 | 146 | 0.591161194 | ko04723 |
| Cocaine addiction                       | 10 | 77  | 0.591959666 | ko05030 |
| Proximal tubule bicarbonate reclamation | 7  | 54  | 0.596426548 | ko04964 |
| Vascular smooth muscle contraction      | 31 | 239 | 0.60539144  | ko04270 |
| Lysosome                                | 29 | 224 | 0.607524318 | ko04142 |
| Sphingolipid metabolism                 | 11 | 86  | 0.610248876 | ko00600 |
| Phosphonate and phosphinate metabolism  | 2  | 15  | 0.615830642 | ko00440 |
| Bladder cancer                          | 13 | 102 | 0.616675928 | ko05219 |
| Salivary secretion                      | 21 | 164 | 0.619395504 | ko04970 |
| Toxoplasmosis                           | 35 | 272 | 0.625723777 | ko05145 |
| Starch and sucrose metabolism           | 16 | 126 | 0.625730091 | ko00500 |
| Glycosaminoglycan degradation           | 4  | 32  | 0.63234341  | ko00531 |
| Gap junction                            | 22 | 174 | 0.64205903  | ko04540 |
| Pyrimidine metabolism                   | 24 | 190 | 0.64706352  | ko00240 |
| Sulfur metabolism                       | 2  | 16  | 0.647558025 | ko00920 |
| Aflatoxin biosynthesis                  | 2  | 16  | 0.647558025 | ko00254 |
| Galactose metabolism                    | 8  | 66  | 0.663731303 | ko00052 |
| N-Glycan biosynthesis                   | 10 | 82  | 0.663858183 | ko00510 |
| p53 signaling pathway                   | 15 | 122 | 0.668953928 | ko04115 |
| HTLV-I infection                        | 69 | 539 | 0.672242233 | ko05166 |

|                                                               |    |     |             |         |
|---------------------------------------------------------------|----|-----|-------------|---------|
| Glycosaminoglycan biosynthesis - heparan sulfate /<br>heparin | 4  | 34  | 0.675284854 | ko00534 |
| Basal cell carcinoma                                          | 11 | 91  | 0.677353833 | ko05217 |
| TNF signaling pathway                                         | 26 | 210 | 0.686171701 | ko04668 |
| SNARE interactions in vesicular transport                     | 5  | 43  | 0.68797456  | ko04130 |
| Natural killer cell mediated cytotoxicity                     | 22 | 179 | 0.688717686 | ko04650 |
| GnRH signaling pathway                                        | 24 | 195 | 0.691556236 | ko04912 |
| Dopaminergic synapse                                          | 28 | 227 | 0.697376155 | ko04728 |
| ErbB signaling pathway                                        | 23 | 188 | 0.698835875 | ko04012 |
| Wnt signaling pathway                                         | 35 | 282 | 0.700596061 | ko04310 |
| Dilated cardiomyopathy                                        | 20 | 165 | 0.704547363 | ko05414 |
| Folate biosynthesis                                           | 2  | 18  | 0.704710726 | ko00790 |
| Glycosphingolipid biosynthesis - ganglio series               | 2  | 18  | 0.704710726 | ko00604 |
| Taste transduction                                            | 5  | 44  | 0.705640882 | ko04742 |
| Non-homologous end-joining                                    | 3  | 27  | 0.707764049 | ko03450 |
| Collecting duct acid secretion                                | 3  | 27  | 0.707764049 | ko04966 |
| Endocytosis                                                   | 60 | 477 | 0.710028939 | ko04144 |
| Glycosylphosphatidylinositol(GPI)-anchor biosynthesis         | 4  | 36  | 0.714608166 | ko00563 |
| Dorso-ventral axis formation                                  | 6  | 53  | 0.715601094 | ko04320 |
| Oxytocin signaling pathway                                    | 42 | 339 | 0.717582509 | ko04921 |
| MAPK signaling pathway - yeast                                | 7  | 62  | 0.725139266 | ko04011 |
| Amoebiasis                                                    | 28 | 231 | 0.728021496 | ko05146 |
| Oocyte meiosis                                                | 24 | 200 | 0.732761322 | ko04114 |
| Glycerophospholipid metabolism                                | 24 | 201 | 0.740582981 | ko00564 |
| VEGF signaling pathway                                        | 16 | 137 | 0.740869375 | ko04370 |



|                                                        |     |     |             |         |
|--------------------------------------------------------|-----|-----|-------------|---------|
| Aldosterone-regulated sodium reabsorption              | 9   | 80  | 0.742860496 | ko04960 |
| Vitamin B6 metabolism                                  | 1   | 10  | 0.750766034 | ko00750 |
| Measles                                                | 25  | 211 | 0.755924395 | ko05162 |
| Progesterone-mediated oocyte maturation                | 23  | 197 | 0.770664036 | ko04914 |
| Propanoate metabolism                                  | 6   | 57  | 0.773093349 | ko00640 |
| Ras signaling pathway                                  | 48  | 396 | 0.77502564  | ko04014 |
| Malaria                                                | 7   | 66  | 0.777759723 | ko05144 |
| Rap1 signaling pathway                                 | 59  | 483 | 0.778916354 | ko04015 |
| Arrhythmogenic right ventricular cardiomyopathy (ARVC) | 14  | 125 | 0.780243466 | ko05412 |
| Hedgehog signaling pathway                             | 8   | 75  | 0.782812273 | ko04340 |
| Pathways in cancer                                     | 109 | 872 | 0.782847806 | ko05200 |
| T cell receptor signaling pathway                      | 24  | 207 | 0.784464557 | ko04660 |
| TGF-beta signaling pathway                             | 20  | 175 | 0.787263698 | ko04350 |
| Hypertrophic cardiomyopathy (HCM)                      | 14  | 126 | 0.788999648 | ko05410 |
| Base excision repair                                   | 5   | 50  | 0.796792801 | ko03410 |
| Cytosolic DNA-sensing pathway                          | 6   | 59  | 0.798365099 | ko04623 |
| Other glycan degradation                               | 2   | 23  | 0.814369071 | ko00511 |
| Pantothenate and CoA biosynthesis                      | 2   | 23  | 0.814369071 | ko00770 |
| Mineral absorption                                     | 7   | 70  | 0.822518123 | ko04978 |
| Adrenergic signaling in cardiomyocytes                 | 34  | 295 | 0.827600987 | ko04261 |
| Cyanoamino acid metabolism                             | 1   | 13  | 0.829383284 | ko00460 |
| Non-alcoholic fatty liver disease (NAFLD)              | 35  | 304 | 0.832214887 | ko04932 |
| Ribosome biogenesis in eukaryotes                      | 13  | 123 | 0.83255894  | ko03008 |
| Huntington's disease                                   | 39  | 337 | 0.835874903 | ko05016 |

|                                                                            |    |     |             |         |
|----------------------------------------------------------------------------|----|-----|-------------|---------|
| Vasopressin-regulated water reabsorption                                   | 10 | 98  | 0.838406812 | ko04962 |
| Leukocyte transendothelial migration                                       | 31 | 273 | 0.839081761 | ko04670 |
| Phosphatidylinositol signaling system                                      | 25 | 225 | 0.84456185  | ko04070 |
| RIG-I-like receptor signaling pathway                                      | 11 | 108 | 0.848763423 | ko04622 |
| Styrene degradation                                                        | 1  | 14  | 0.849631312 | ko00643 |
| Tight junction                                                             | 38 | 335 | 0.862123316 | ko04530 |
| Pathogenic Escherichia coli infection                                      | 11 | 110 | 0.863141186 | ko05130 |
| Insulin signaling pathway                                                  | 35 | 311 | 0.863858876 | ko04910 |
| Glioma                                                                     | 17 | 162 | 0.865392488 | ko05214 |
| Glycosphingolipid biosynthesis - globo series                              | 1  | 15  | 0.867476743 | ko00603 |
| Colorectal cancer                                                          | 18 | 171 | 0.868263236 | ko05210 |
| Jak-STAT signaling pathway                                                 | 24 | 222 | 0.871197041 | ko04630 |
| Cell cycle - yeast                                                         | 11 | 112 | 0.876410983 | ko04111 |
| NOD-like receptor signaling pathway                                        | 12 | 121 | 0.877682209 | ko04621 |
| MAPK signaling pathway                                                     | 49 | 430 | 0.883110113 | ko04010 |
| Viral carcinogenesis                                                       | 55 | 481 | 0.890695705 | ko05203 |
| Non-small cell lung cancer                                                 | 14 | 141 | 0.891663211 | ko05223 |
| Glycosaminoglycan biosynthesis - chondroitin sulfate /<br>dermatan sulfate | 2  | 29  | 0.896924864 | ko00532 |
| Regulation of actin cytoskeleton                                           | 47 | 422 | 0.907625654 | ko04810 |
| Meiosis - yeast                                                            | 9  | 100 | 0.911426739 | ko04113 |
| Alanine, aspartate and glutamate metabolism                                | 5  | 62  | 0.911630402 | ko00250 |
| MicroRNAs in cancer                                                        | 33 | 308 | 0.912479697 | ko05206 |
| Acute myeloid leukemia                                                     | 12 | 128 | 0.914676114 | ko05221 |
| mRNA surveillance pathway                                                  | 13 | 137 | 0.914793136 | ko03015 |

|                                                            |    |     |             |         |
|------------------------------------------------------------|----|-----|-------------|---------|
| RNA transport                                              | 26 | 250 | 0.915458252 | ko03013 |
| Endocrine and other factor-regulated calcium reabsorption  | 10 | 111 | 0.920165394 | ko04961 |
| Chagas disease (American trypanosomiasis)                  | 29 | 277 | 0.920370719 | ko05142 |
| Protein processing in endoplasmic reticulum                | 36 | 336 | 0.920888786 | ko04141 |
| Long-term depression                                       | 9  | 102 | 0.921380626 | ko04730 |
| Synaptic vesicle cycle                                     | 8  | 93  | 0.923217499 | ko04721 |
| FoxO signaling pathway                                     | 35 | 329 | 0.924529988 | ko04068 |
| Ubiquitin mediated proteolysis                             | 23 | 228 | 0.927067509 | ko04120 |
| Streptomycin biosynthesis                                  | 2  | 33  | 0.931347903 | ko00521 |
| Vibrio cholerae infection                                  | 10 | 114 | 0.932980767 | ko05110 |
| Bacterial invasion of epithelial cells                     | 21 | 213 | 0.934079372 | ko05100 |
| Axon guidance                                              | 33 | 316 | 0.934201395 | ko04360 |
| Notch signaling pathway                                    | 12 | 133 | 0.934924004 | ko04330 |
| Homologous recombination                                   | 3  | 45  | 0.93508558  | ko03440 |
| Apoptosis                                                  | 16 | 170 | 0.937562677 | ko04210 |
| Mismatch repair                                            | 2  | 34  | 0.938071286 | ko03430 |
| B cell receptor signaling pathway                          | 13 | 145 | 0.944281291 | ko04662 |
| Endometrial cancer                                         | 11 | 127 | 0.945950949 | ko05213 |
| cGMP-PKG signaling pathway                                 | 37 | 357 | 0.949229107 | ko04022 |
| Alcoholism                                                 | 14 | 157 | 0.952189282 | ko05034 |
| Melanoma                                                   | 12 | 140 | 0.956253178 | ko05218 |
| Ribosome                                                   | 24 | 249 | 0.957094514 | ko03010 |
| Fc gamma R-mediated phagocytosis                           | 20 | 215 | 0.960092276 | ko04666 |
| Epithelial cell signaling in Helicobacter pylori infection | 11 | 134 | 0.964497503 | ko05120 |
| Toll-like receptor signaling pathway                       | 13 | 156 | 0.970189362 | ko04620 |

|                                         |    |     |             |         |
|-----------------------------------------|----|-----|-------------|---------|
| African trypanosomiasis                 | 2  | 41  | 0.970310056 | ko05143 |
| Basal transcription factors             | 4  | 65  | 0.970415137 | ko03022 |
| Long-term potentiation                  | 11 | 137 | 0.970529433 | ko04720 |
| Sphingolipid signaling pathway          | 24 | 258 | 0.971573733 | ko04071 |
| Osteoclast differentiation              | 19 | 213 | 0.971951407 | ko04380 |
| Choline metabolism in cancer            | 21 | 232 | 0.973000141 | ko05231 |
| cAMP signaling pathway                  | 43 | 426 | 0.973673335 | ko04024 |
| Prostate cancer                         | 20 | 224 | 0.974479108 | ko05215 |
| Proteasome                              | 3  | 55  | 0.974519126 | ko03050 |
| Transcriptional misregulation in cancer | 30 | 314 | 0.9747739   | ko05202 |
| mTOR signaling pathway                  | 10 | 130 | 0.975377916 | ko04150 |
| Small cell lung cancer                  | 22 | 243 | 0.975442923 | ko05222 |
| RNA degradation                         | 12 | 151 | 0.977458005 | ko03018 |
| Carbohydrate digestion and absorption   | 5  | 80  | 0.978676486 | ko04973 |
| Neurotrophin signaling pathway          | 22 | 247 | 0.979884491 | ko04722 |
| Hippo signaling pathway                 | 26 | 286 | 0.982296328 | ko04390 |
| MAPK signaling pathway - fly            | 1  | 31  | 0.98244941  | ko04013 |
| Chronic myeloid leukemia                | 15 | 186 | 0.984328871 | ko05220 |
| Hepatitis B                             | 29 | 316 | 0.984576481 | ko05161 |
| Prolactin signaling pathway             | 12 | 157 | 0.984586981 | ko04917 |
| Fanconi anemia pathway                  | 5  | 86  | 0.987184726 | ko03460 |
| Salmonella infection                    | 13 | 171 | 0.988147337 | ko05132 |
| Adherens junction                       | 22 | 265 | 0.992205137 | ko04520 |
| Maturity onset diabetes of the young    | 1  | 38  | 0.992754397 | ko04950 |
| Cell cycle                              | 21 | 263 | 0.99489858  | ko04110 |

|                                                          |    |     |             |         |
|----------------------------------------------------------|----|-----|-------------|---------|
| Signaling pathways regulating pluripotency of stem cells | 21 | 267 | 0.995954855 | ko04550 |
| Pancreatic cancer                                        | 12 | 177 | 0.996007811 | ko05212 |
| Fc epsilon RI signaling pathway                          | 6  | 116 | 0.997393931 | ko04664 |
| HIF-1 signaling pathway                                  | 19 | 256 | 0.997603726 | ko04066 |
| DNA replication                                          | 2  | 64  | 0.997639045 | ko03030 |
| Central carbon metabolism in cancer                      | 10 | 163 | 0.997681439 | ko05230 |
| Hepatitis C                                              | 15 | 222 | 0.998461618 | ko05160 |
| Nucleotide excision repair                               | 2  | 68  | 0.998498724 | ko03420 |
| Shigellosis                                              | 7  | 137 | 0.998817869 | ko05131 |
| Thyroid hormone signaling pathway                        | 21 | 297 | 0.999363264 | ko04919 |
| Type II diabetes mellitus                                | 4  | 106 | 0.999402866 | ko04930 |
| Epstein-Barr virus infection                             | 29 | 382 | 0.999534534 | ko05169 |
| Hippo signaling pathway - fly                            | 7  | 149 | 0.999590834 | ko04391 |
| Amino sugar and nucleotide sugar metabolism              | 2  | 86  | 0.999810099 | ko00520 |
| Renal cell carcinoma                                     | 8  | 172 | 0.99984154  | ko05211 |
| Spliceosome                                              | 10 | 200 | 0.999884654 | ko03040 |
