# Supplementary material for: Transcriptomic Analysis of Liver Tissue of Black Sea Bass (Centropristis striata) Exposed to High Nitrogen Environment
Source: MDPI journal article supplement (doi:10.3390/genes14071440), 2023-07-13
Supplement: s1 [file s1]

BP

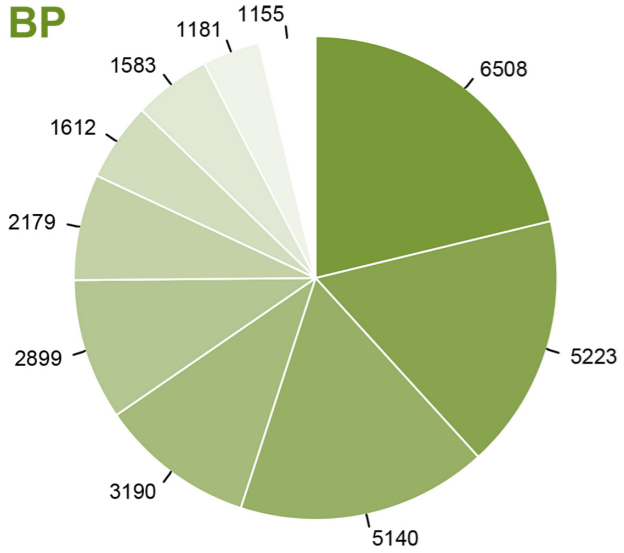

level2

- cellular process (6508)
- single-organism process (5223)
- metabolic process (5140)
- biological regulation (3190)
- regulation of biological process (2899)
- response to stimulus (2179)
- signaling (1612)
- localization (1583)
- cellular component organization or biogenesis (1181)
- multicellular organismal process (1155)

level3

- organic substance metabolic process (4346)
- primary metabolic process (4231)
- single-organism cellular process (4190)
- cellular metabolic process (4031)
- regulation of biological process (2899)
- regulation of cellular process (2829)
- nitrogen compound metabolic process (2363)
- biosynthetic process (1905)
- single-organism metabolic process (1888)
- cellular response to stimulus (1841)

level4

- macromolecule metabolic process (3471)
- cellular macromolecule metabolic process (3069)
- regulation of cellular process (2829)
- cellular nitrogen compound metabolic process (2210)
- protein metabolic process (2105)
- organic cyclic compound metabolic process (1999)
- cellular aromatic compound metabolic process (1951)
- heterocycle metabolic process (1949)
- nucleobase-containing compound metabolic process (1888)
- organic substance biosynthetic process (1845)

CC

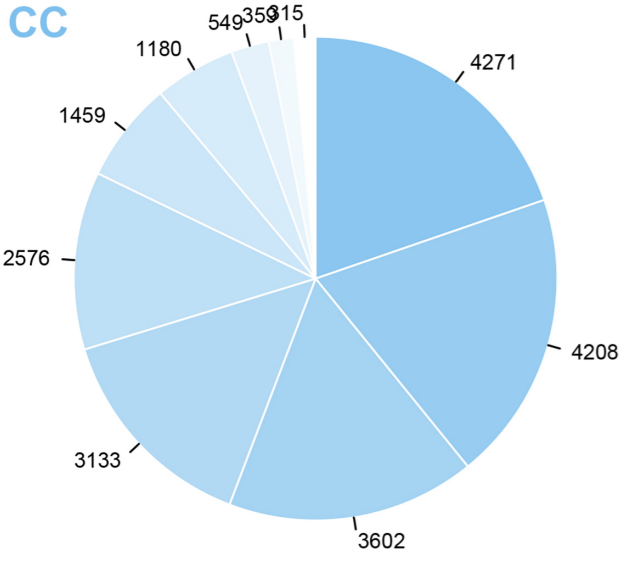

- cell (4271)
- cell part (4208)
- membrane (3602)
- membrane part (3133)
- organelle (2576)
- macromolecular complex (1459)
- organelle part (1180)
- extracellular region (549)
- extracellular region part (359)
- membrane-enclosed lumen (315)

- cell part (4208)
- intracellular (3829)
- intracellular part (3174)
- membrane part (3133)
- intrinsic component of membrane (2865)
- intracellular organelle (2490)
- membrane-bounded organelle (2072)
- organelle part (1180)
- intracellular organelle part (1168)
- protein complex (1161)

- intracellular (3829)
- intracellular part (3174)
- intrinsic component of membrane (2865)
- integral component of membrane (2859)
- intracellular organelle (2490)
- intracellular membrane-bounded organelle (2005)
- cytoplasm (1770)
- cytoplasmic part (1197)
- intracellular organelle part (1168)
- intracellular non-membrane-bounded organelle (693)

MF

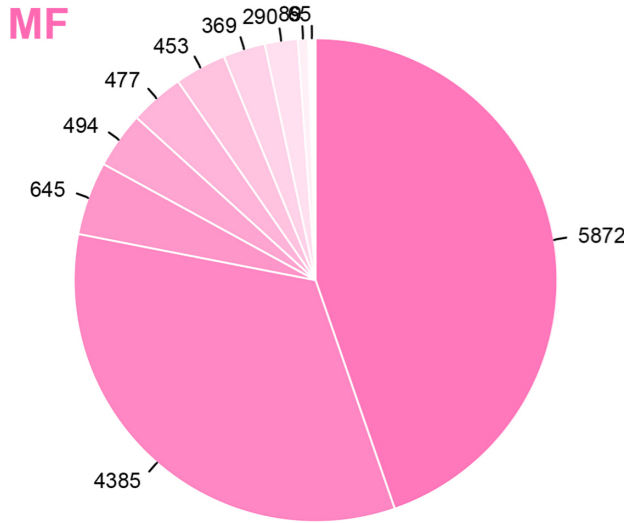

- binding (5872)
- catalytic activity (4385)
- transporter activity (645)
- signal transducer activity (494)
- molecular function regulator (477)
- molecular transducer activity (453)
- nucleic acid binding transcription factor activity (369)
- structural molecule activity (290)
- transcription factor activity, protein binding (89)
- electron carrier activity (65)

- ion binding (3703)
- organic cyclic compound binding (3520)
- heterocyclic compound binding (3509)
- small molecule binding (2061)
- transferase activity (1737)
- carbohydrate derivative binding (1646)
- hydrolase activity (1646)
- protein binding (1138)
- oxidoreductase activity (643)
- substrate-specific transporter activity (490)

- cation binding (2096)
- nucleoside phosphate binding (1983)
- nucleotide binding (1983)
- anion binding (1896)
- nucleic acid binding (1712)
- ribonucleotide binding (1593)
- nucleoside binding (1587)
- transferase activity, transferring phosphorus-containing groups (925)
- hydrolase activity, acting on acid anhydrides (550)
- peptidase activity (444)
