# Supplementary material for: Transcriptomic Analysis of Liver Tissue of Black Sea Bass (Centropristis striata) Exposed to High Nitrogen Environment
Source: MDPI journal article supplement (doi:10.3390/genes14071440), 2023-07-13
Supplement: s1 [file s1]

Table S2. Control (ZD) vs. salt-treated (ZS) GO enrichment.

| ID         | Terms                                                     | Ratio in Study* | Ratio in Total Genes | p-value  | Categories         |
|------------|-----------------------------------------------------------|-----------------|----------------------|----------|--------------------|
| GO:0010884 | positive regulation of lipid storage                      | 0.13%           | 0.01%                | 3.84E-12 | biological process |
| GO:1905954 | positive regulation of lipid localization                 | 0.15%           | 0.02%                | 5.39E-12 | biological process |
| GO:0010883 | regulation of lipid storage                               | 0.14%           | 0.02%                | 5.39E-12 | biological process |
| GO:0050818 | regulation of coagulation                                 | 0.18%           | 0.03%                | 1.06E-11 | biological process |
| GO:1903034 | regulation of response to wounding                        | 0.18%           | 0.03%                | 1.06E-11 | biological process |
| GO:0046890 | regulation of lipid biosynthetic process                  | 0.18%           | 0.03%                | 1.06E-11 | biological process |
| GO:1900046 | regulation of hemostasis                                  | 0.18%           | 0.03%                | 2.30E-11 | biological process |
| GO:0030193 | regulation of blood coagulation                           | 0.18%           | 0.03%                | 2.30E-11 | biological process |
| GO:0061041 | regulation of wound healing                               | 0.18%           | 0.03%                | 2.30E-11 | biological process |
| GO:1900047 | negative regulation of hemostasis                         | 0.15%           | 0.02%                | 2.35E-11 | biological process |
| GO:0030195 | negative regulation of blood coagulation                  | 0.39%           | 0.06%                | 2.35E-11 | biological process |
| GO:0061045 | negative regulation of wound healing                      | 0.14%           | 0.02%                | 2.35E-11 | biological process |
| GO:0051050 | positive regulation of transport                          | 0.14%           | 0.02%                | 2.45E-11 | biological process |
| GO:0050878 | regulation of body fluid levels                           | 0.13%           | 0.02%                | 2.59E-11 | biological process |
| GO:0072562 | blood microparticle                                       | 0.16%           | 0.02%                | 3.11E-11 | cellular component |
| GO:0033344 | cholesterol efflux                                        | 0.95%           | 0.19%                | 3.43E-11 | biological process |
| GO:0080134 | regulation of response to stress                          | 0.95%           | 0.19%                | 3.56E-11 | biological process |
| GO:0034385 | triglyceride-rich plasma lipoprotein particle             | 0.95%           | 0.19%                | 4.48E-11 | cellular component |
| GO:0034361 | very-low-density lipoprotein particle                     | 1.03%           | 0.25%                | 4.48E-11 | cellular component |
| GO:0042627 | chylomicron                                               | 0.17%           | 0.02%                | 4.48E-11 | cellular component |
| GO:0032269 | negative regulation of cellular protein metabolic process | 0.59%           | 0.19%                | 4.58E-11 | biological process |
| GO:0052547 | regulation of peptidase activity                          | 0.60%           | 0.17%                | 4.71E-11 | biological process |
| GO:0042613 | MHC class II protein complex                              | 0.52%           | 0.15%                | 4.78E-11 | cellular component |
| GO:1905952 | regulation of lipid localization                          | 0.55%           | 0.16%                | 4.78E-11 | biological process |
| GO:0052548 | regulation of endopeptidase activity                      | 0.52%           | 0.15%                | 4.80E-11 | biological process |
| GO:0045861 | negative regulation of proteolysis                        | 1.01%           | 0.46%                | 4.80E-11 | biological process |
| GO:0010033 | response to organic substance                             | 1.47%           | 0.77%                | 5.12E-11 | biological process |
| GO:0030162 | regulation of proteolysis                                 | 0.17%           | 0.03%                | 5.16E-11 | biological process |
| GO:0070062 | extracellular exosome                                     | 6.70%           | 5.19%                | 5.67E-11 | cellular component |
| GO:0004857 | enzyme inhibitor activity                                 | 0.61%           | 0.27%                | 5.67E-11 | molecular function |

\* Ratio in study: Number of differentially expressed genes/total differentially expressed genes; Ratio in Total genes: Number of differential expressed genes/total genes.
