# Supplementary figures and images for: Transcriptomic Analysis of Liver Tissue of Black Sea Bass (Centropristis striata) Exposed to High Nitrogen Environment
Source: MDPI journal article supplement (doi:10.3390/genes14071440), 2023-07-13

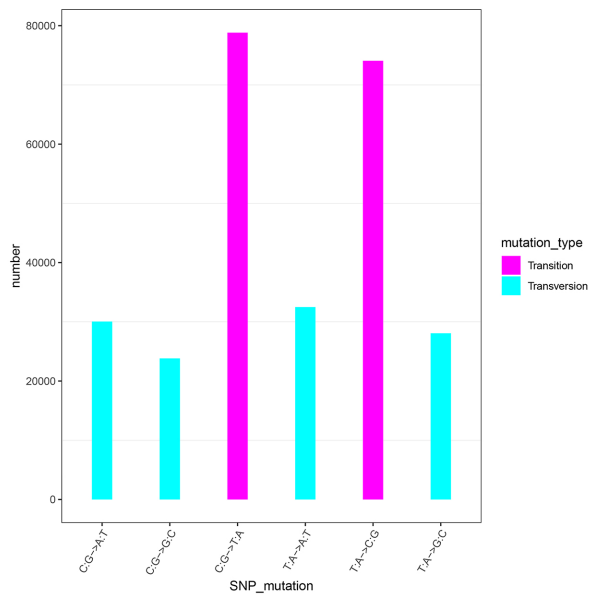

**ZD-1**

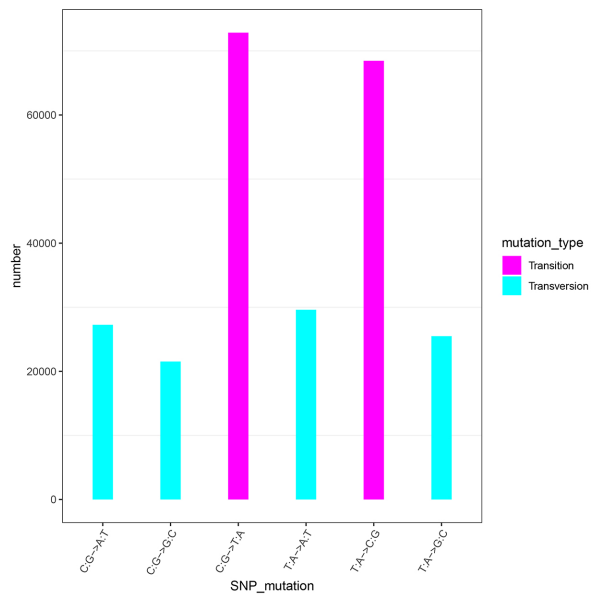

**ZD-2**

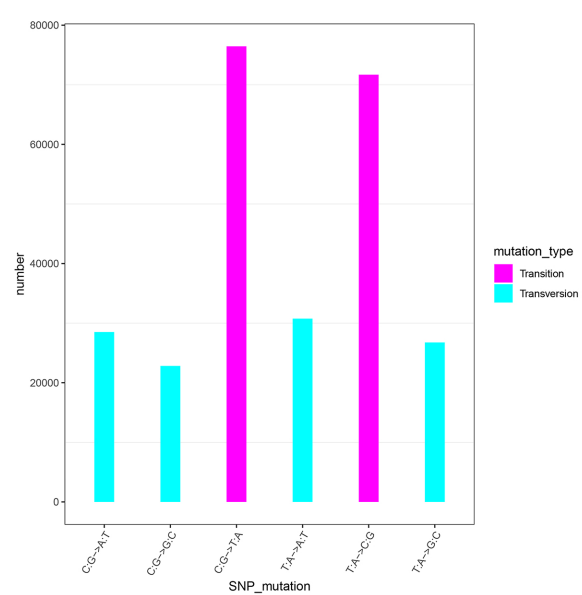

**ZD-3**

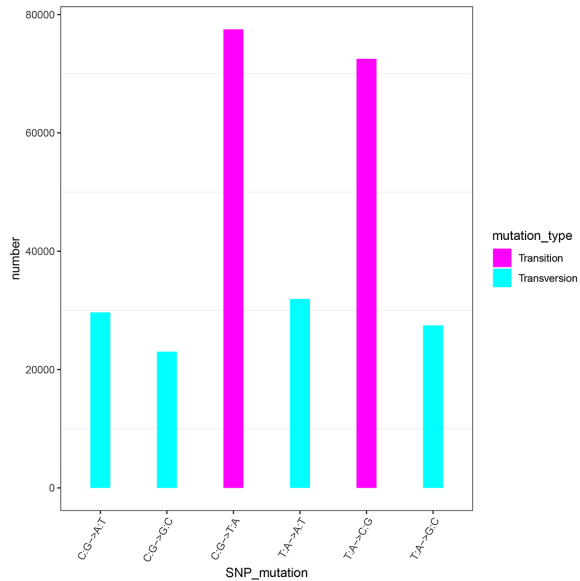

**ZS-1**

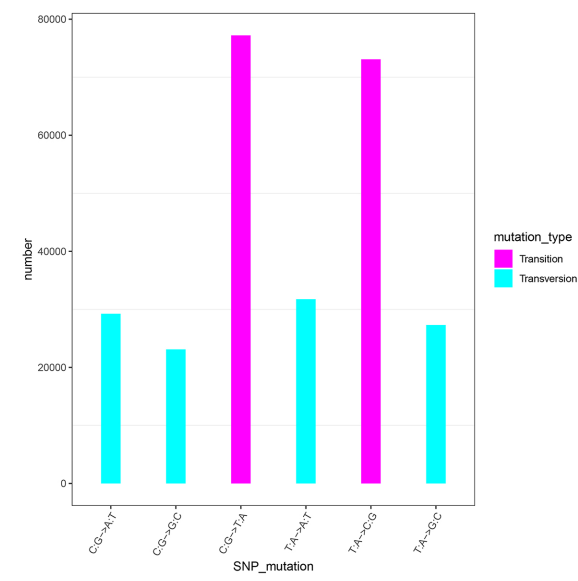

**ZS-2**

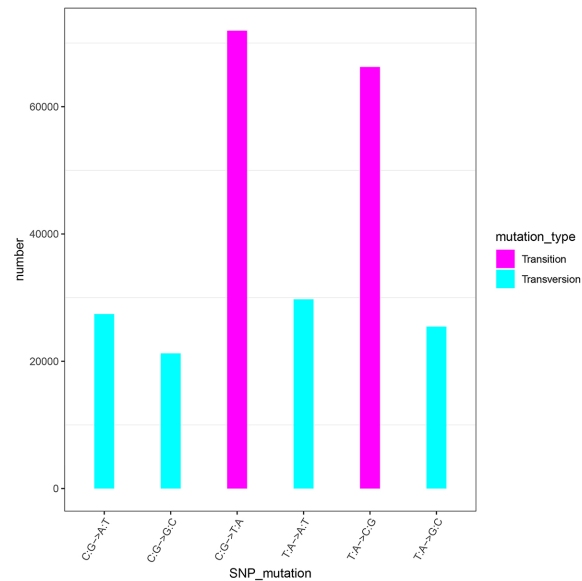

**ZS-3**

Supplement: s1 [file s1]

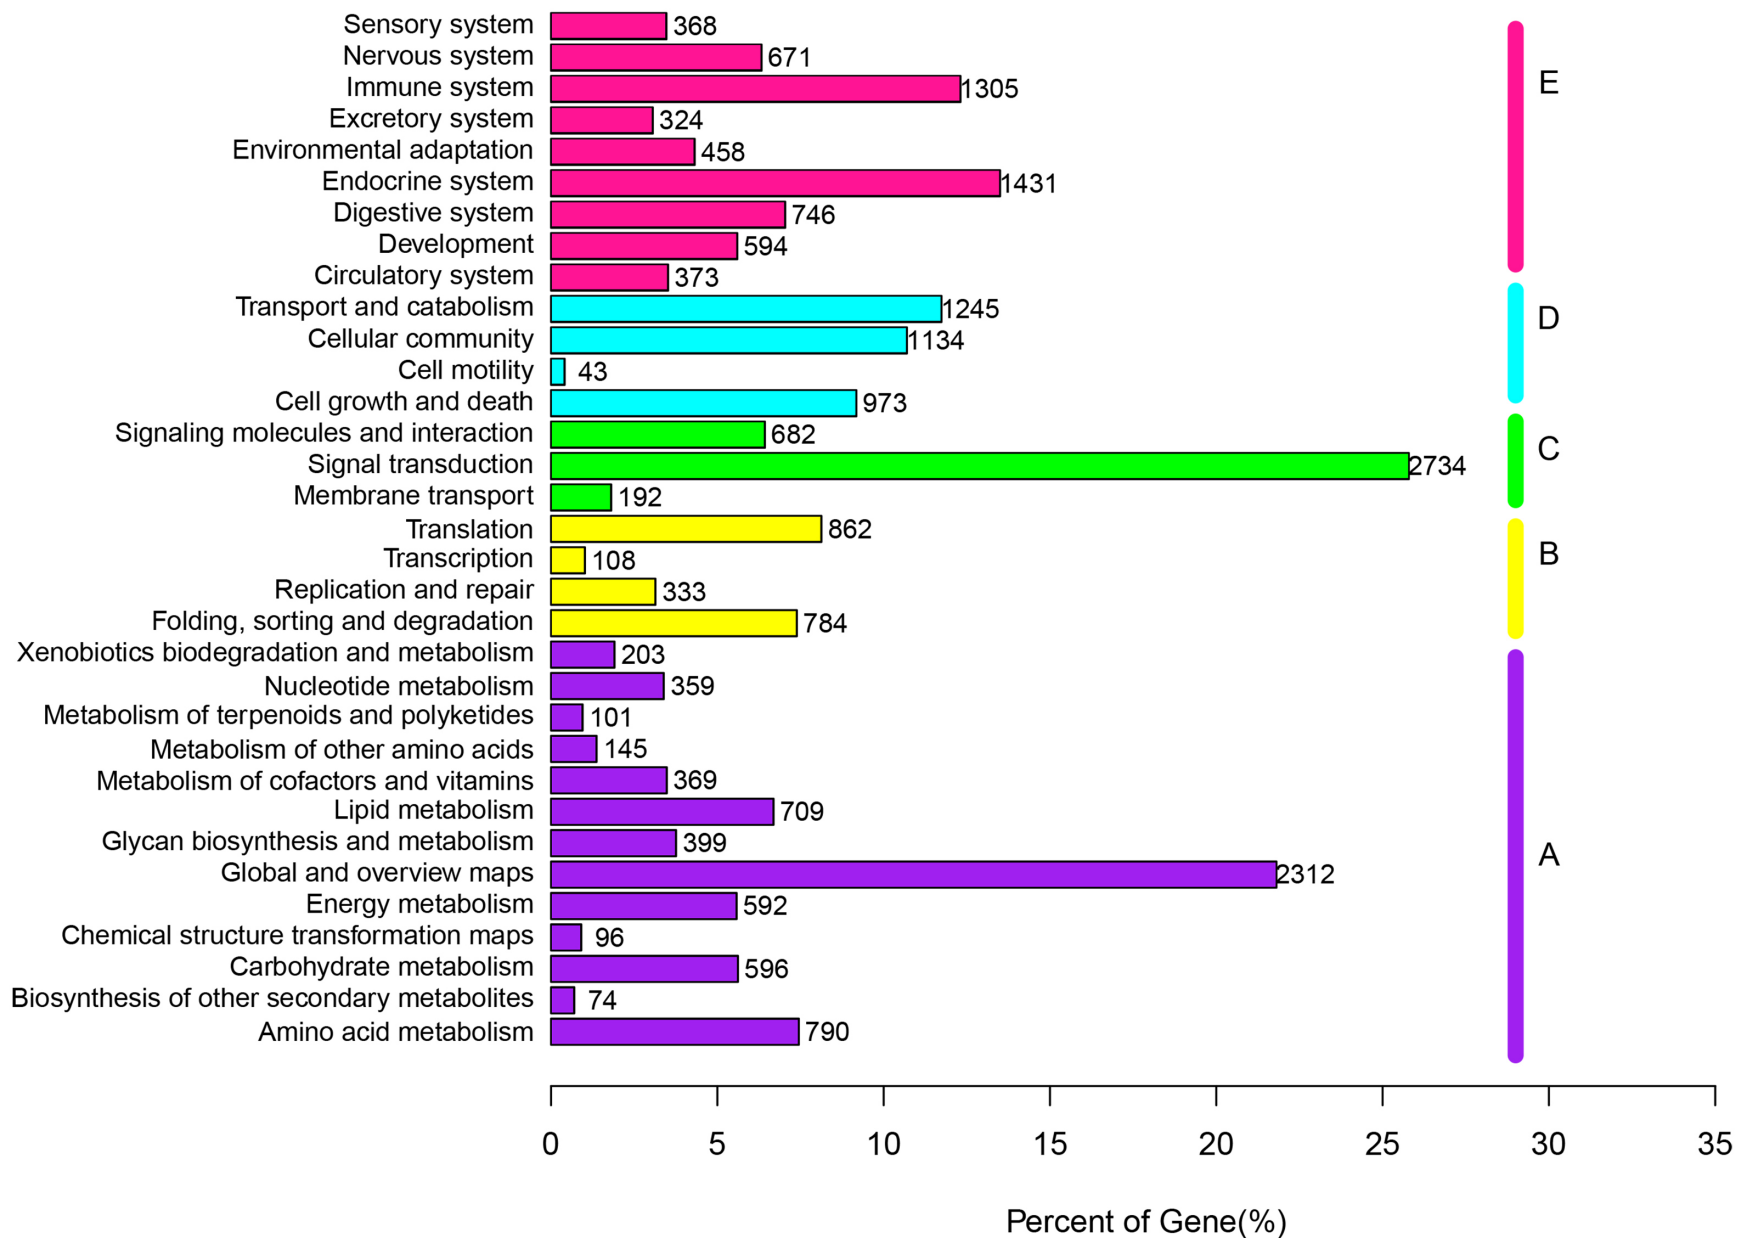

Supplement: s1 [file s1]

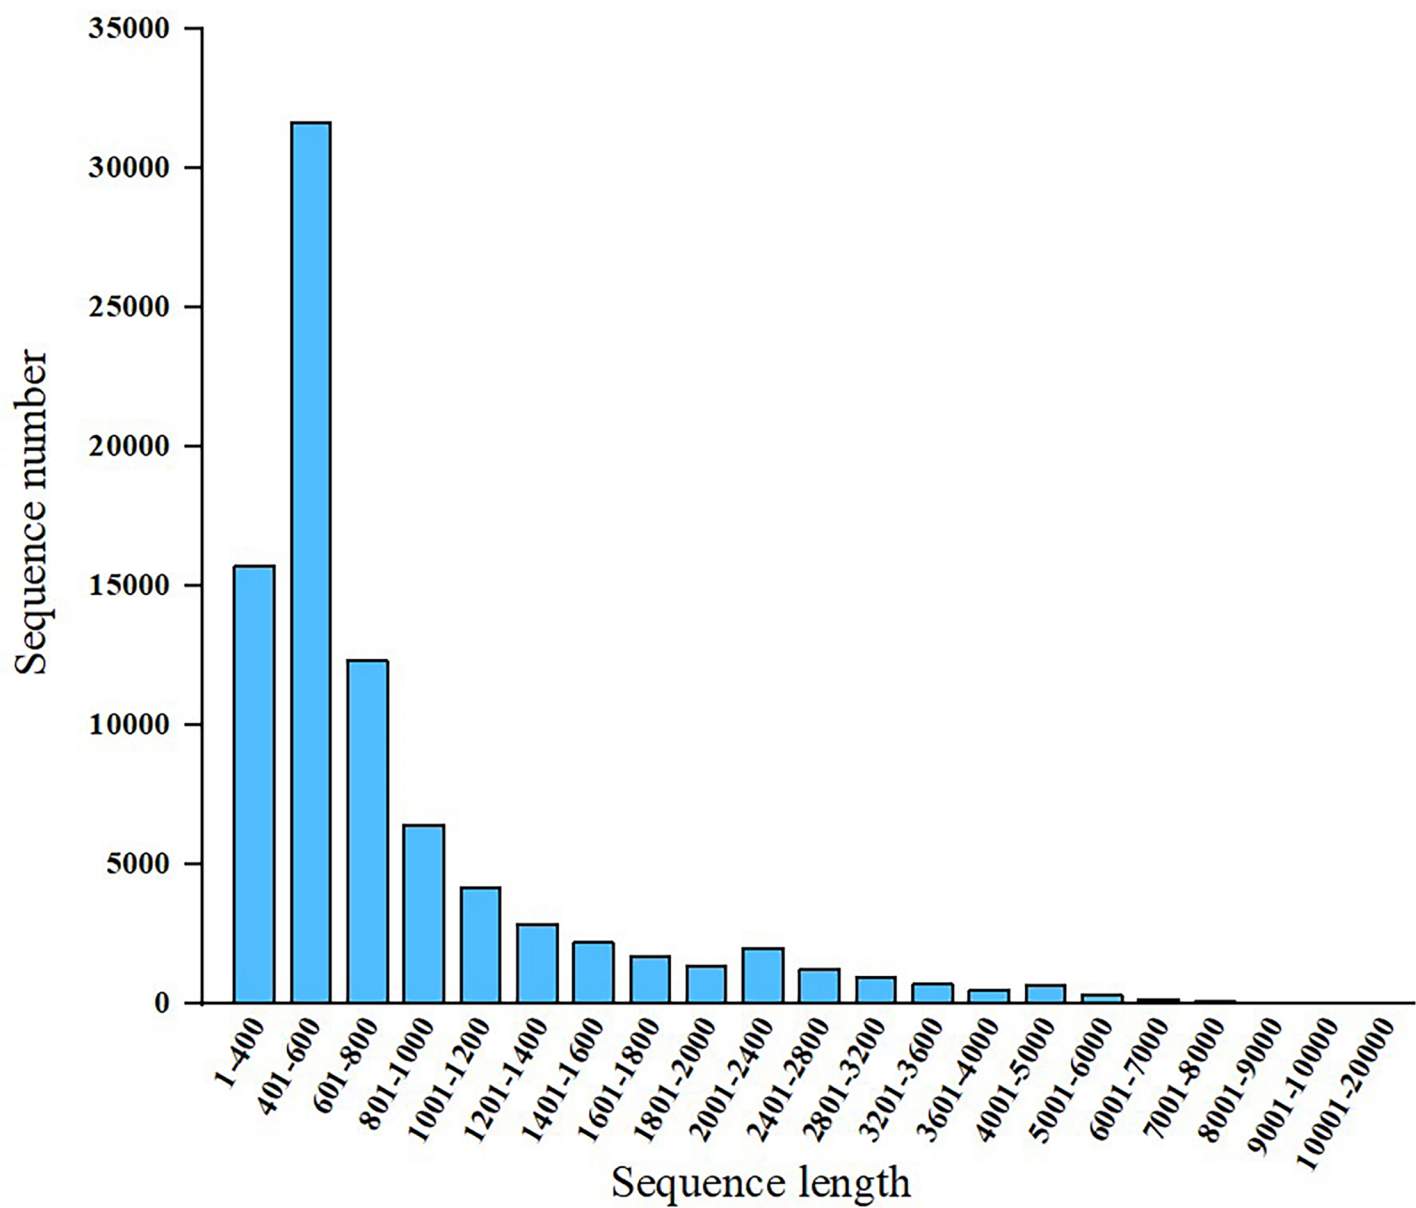

Supplement: s1 [file s1]

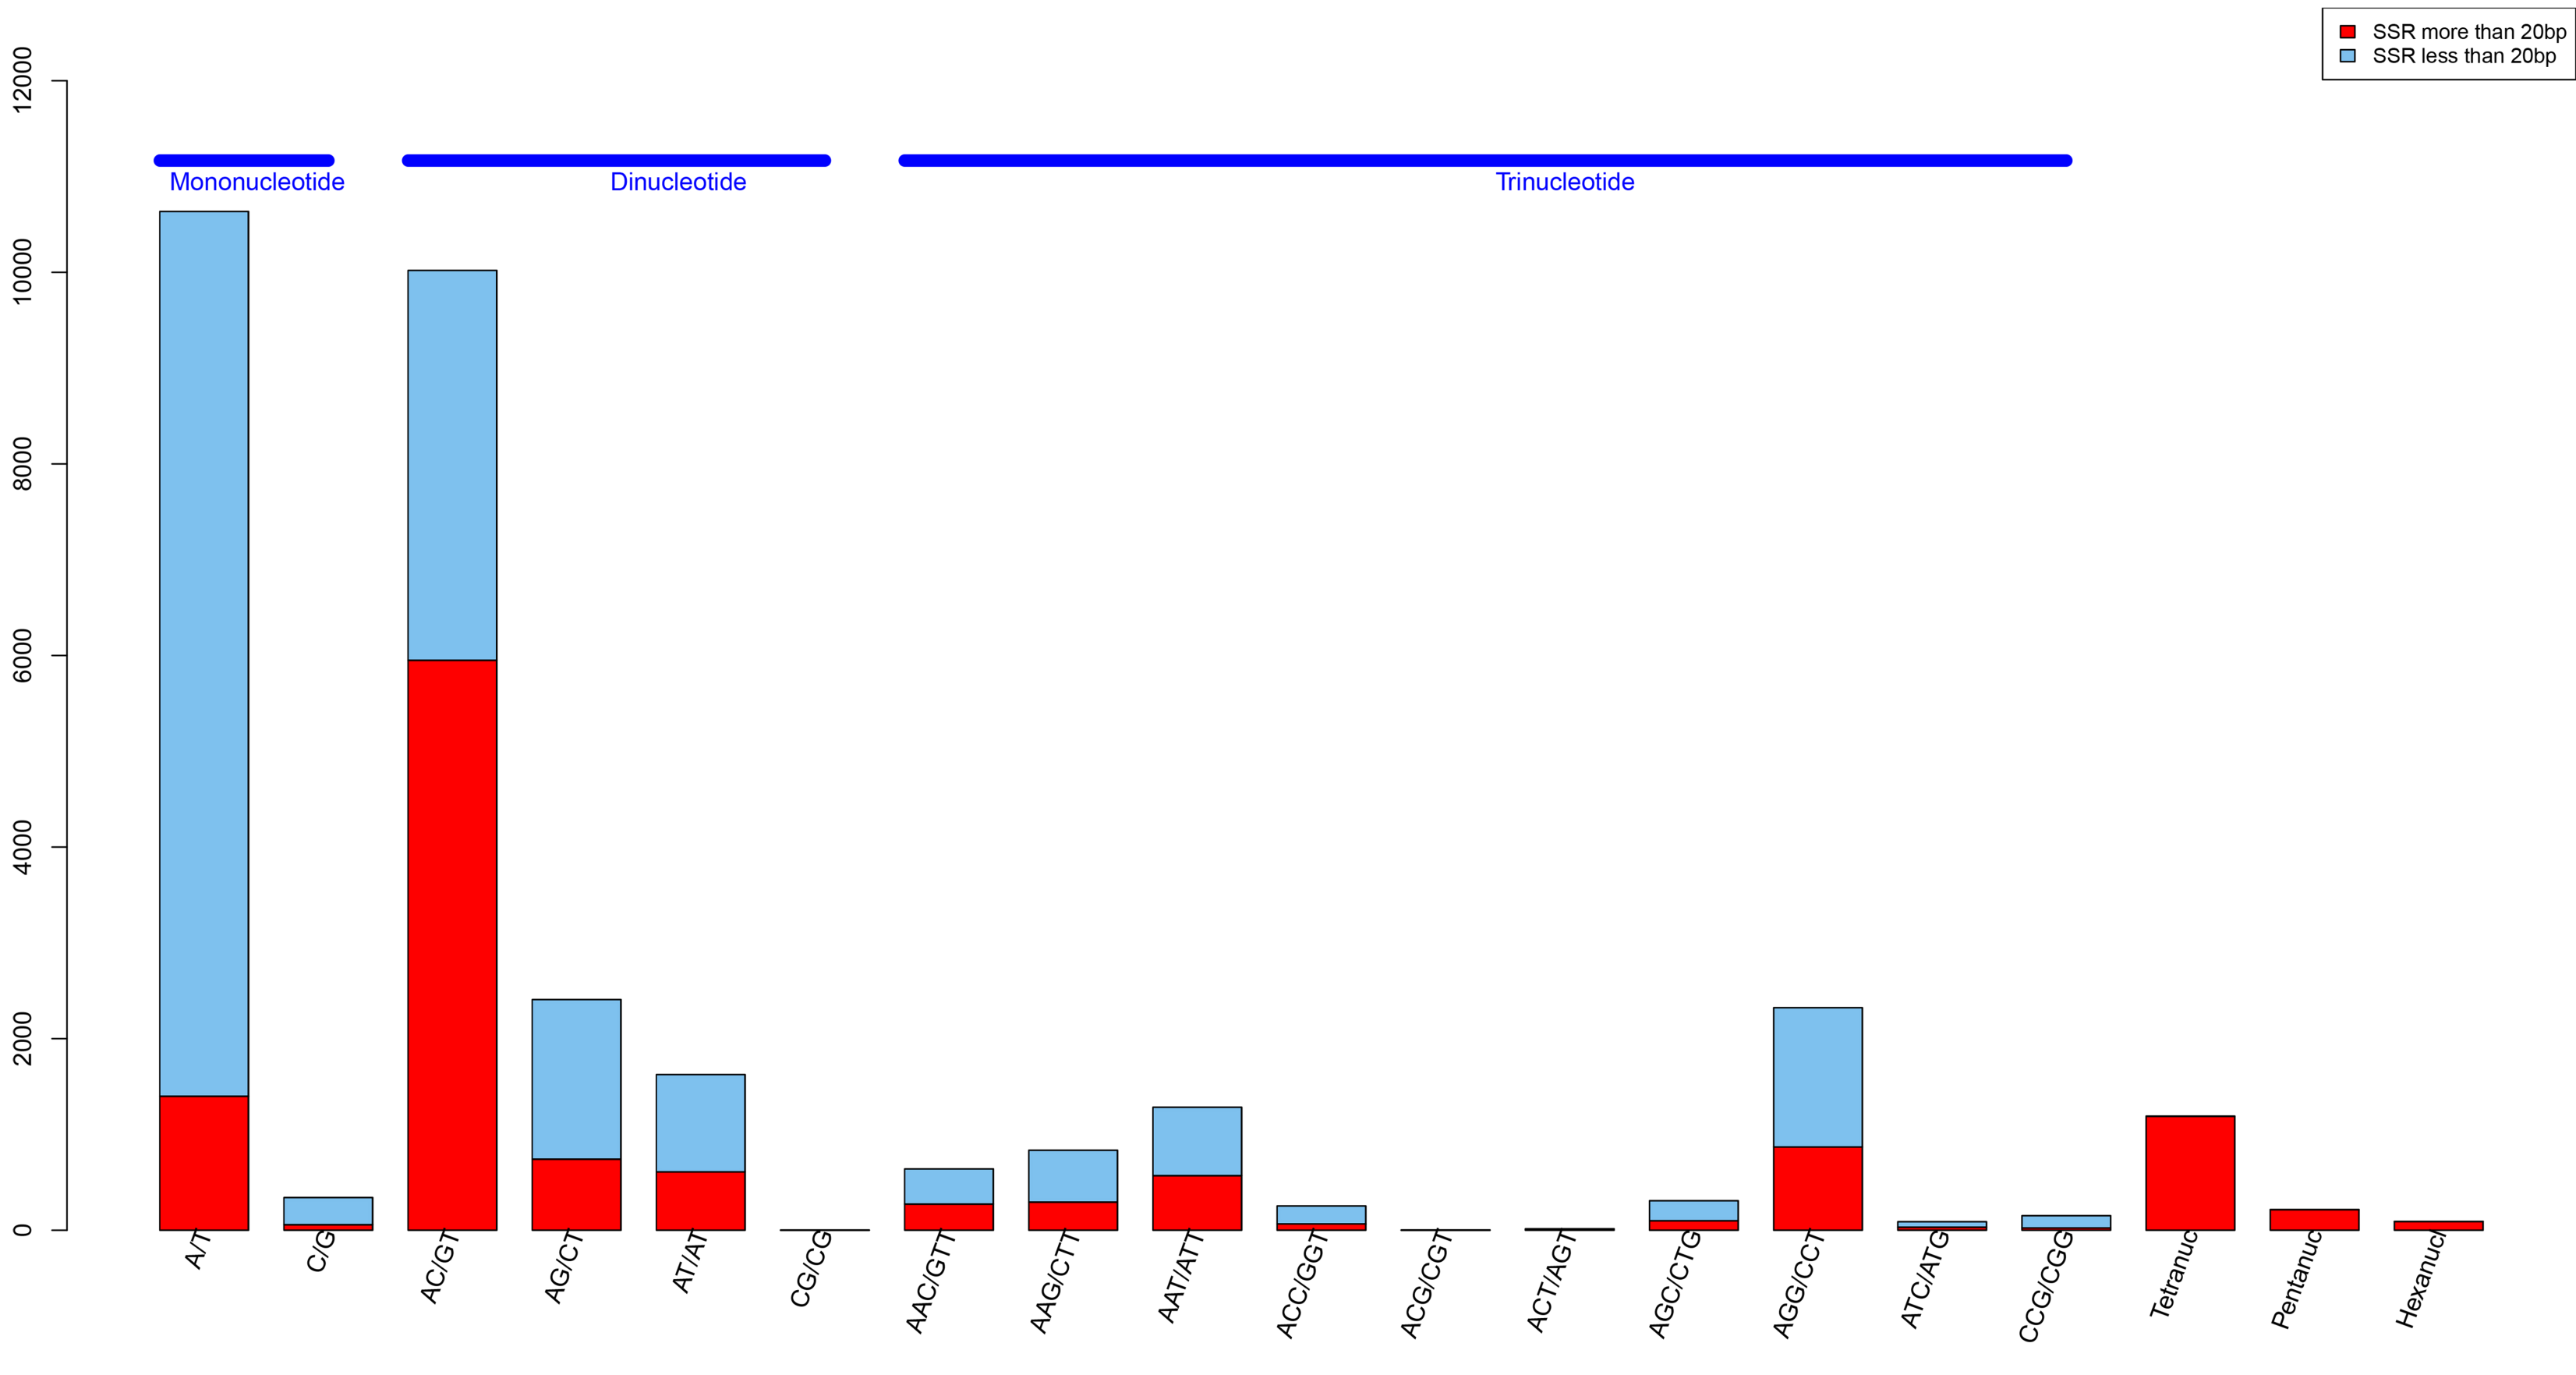

Supplement: s1 [file s1]

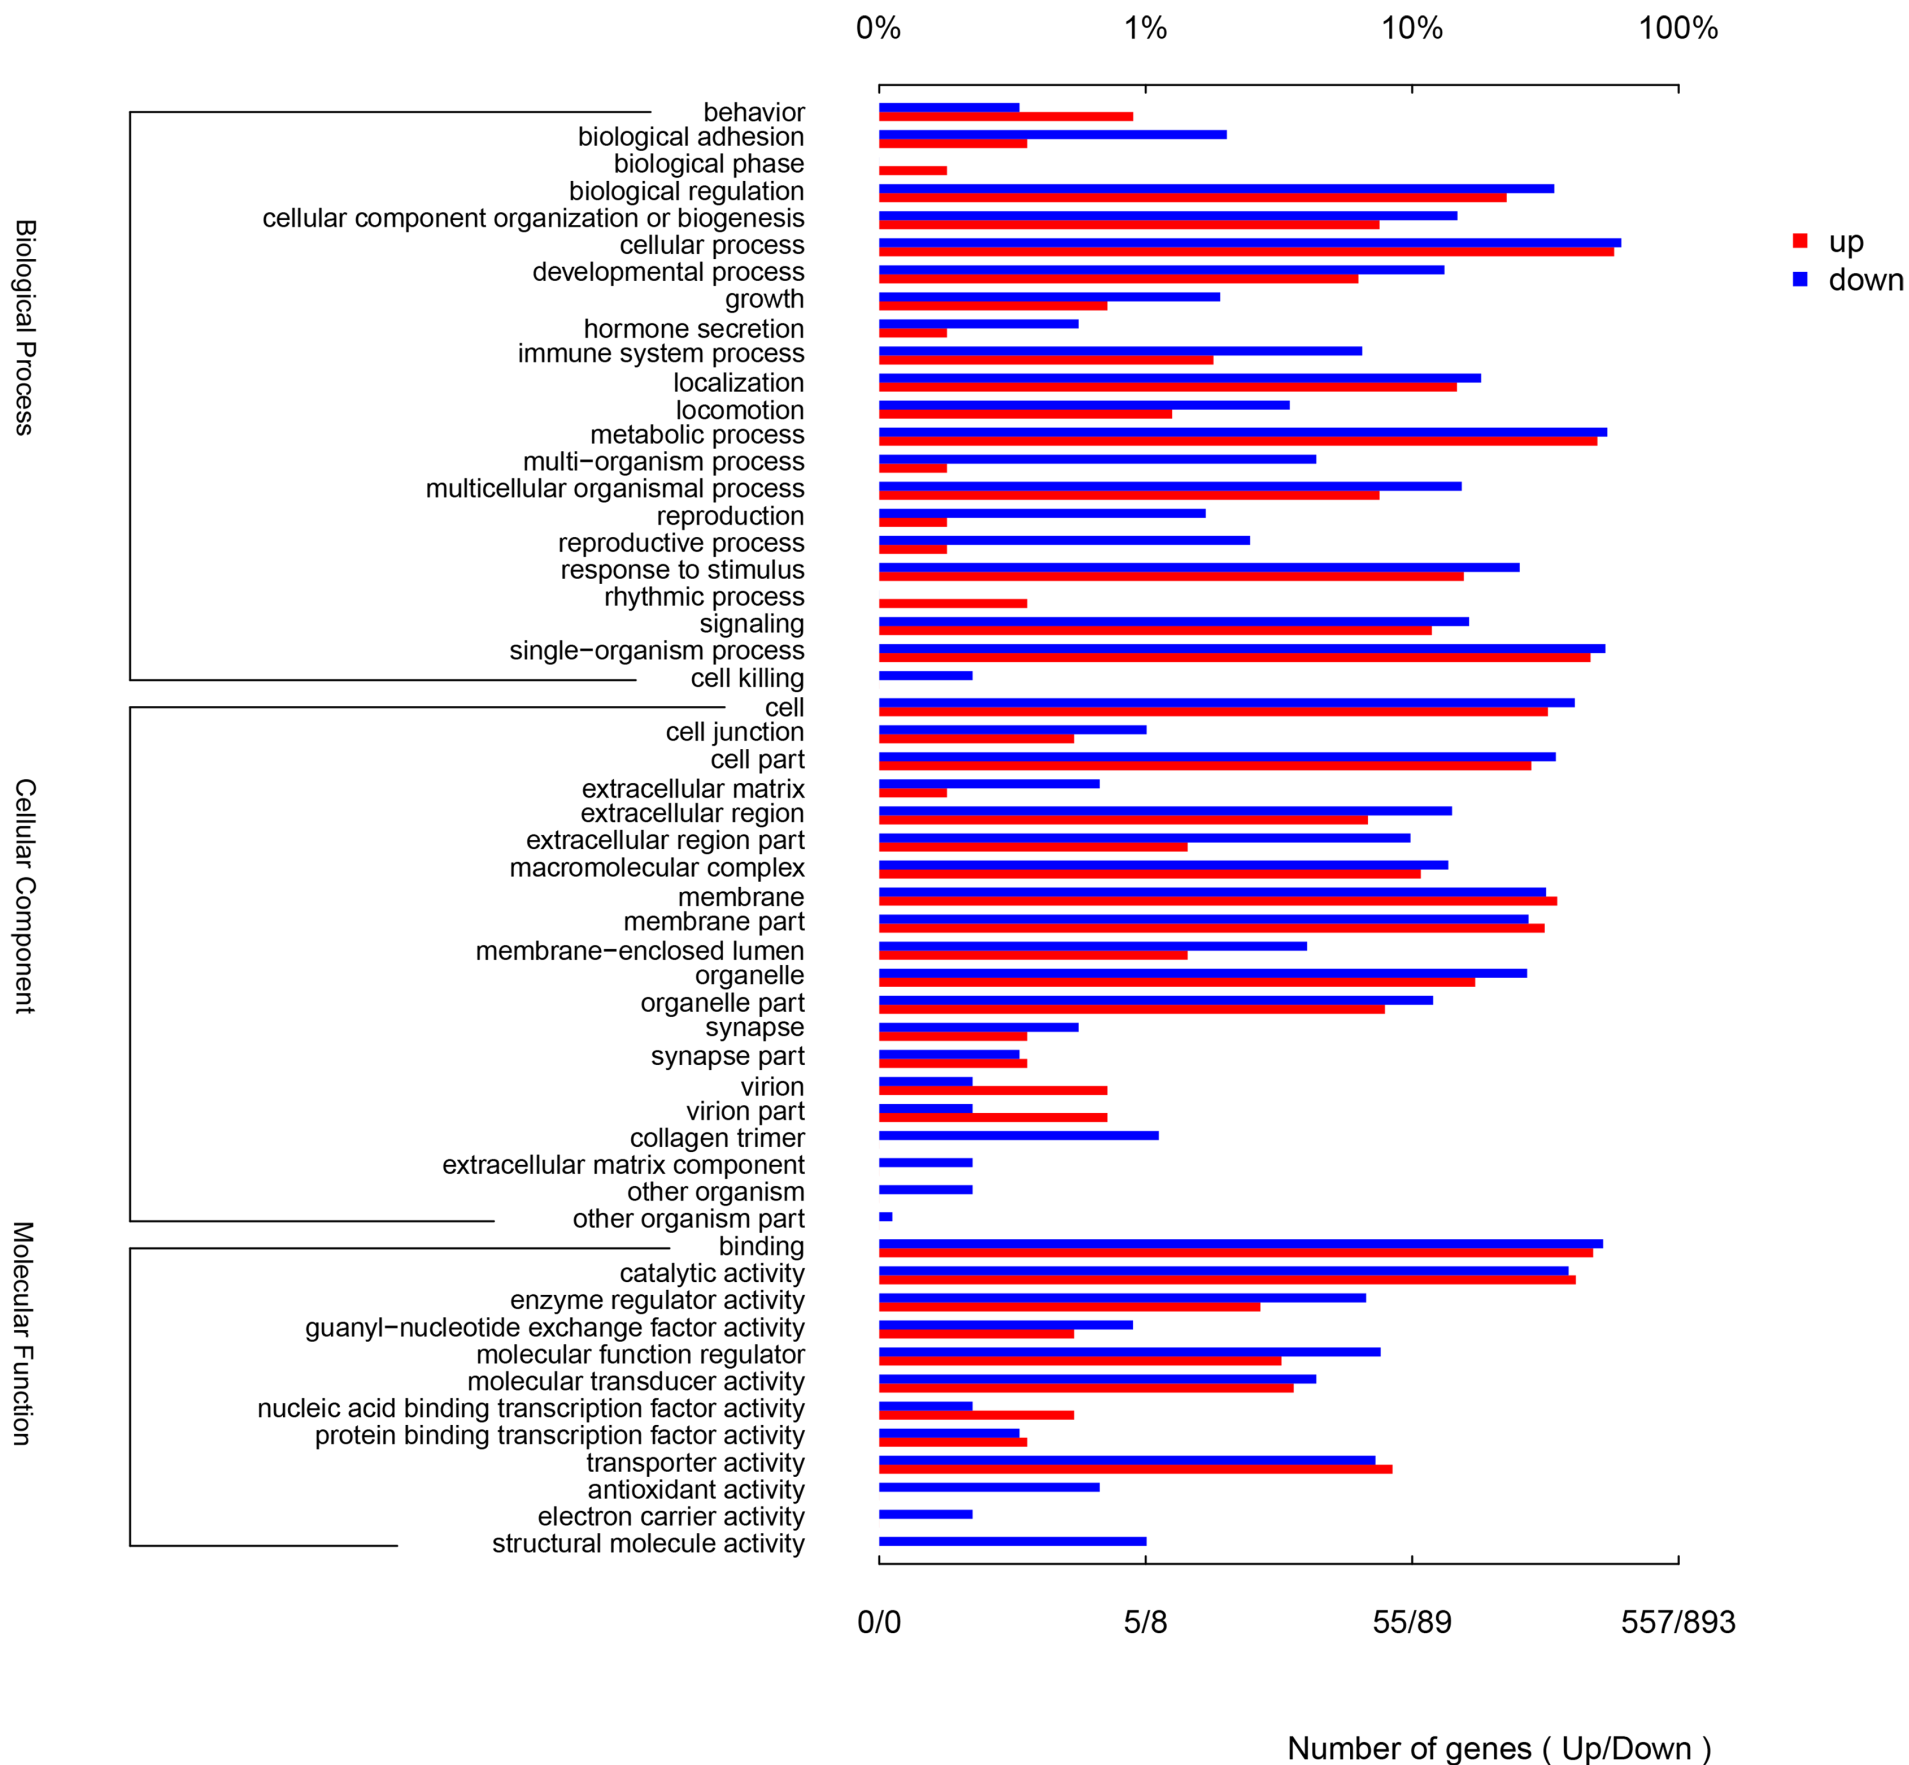

Supplement: s1 [file s1]
